# Supplementary material for: Directed natural evolution generates a next-generation oncolytic virus with a high potency and safety profile
Source: PubMed Central journal article supplement (PMC10256765; doi:10.1038/s41467-023-39156-3), 2023-06-09
Supplement: 41467_2023_39156_MOESM1_ESM.pdf [file 41467_2023_39156_MOESM1_ESM.pdf]

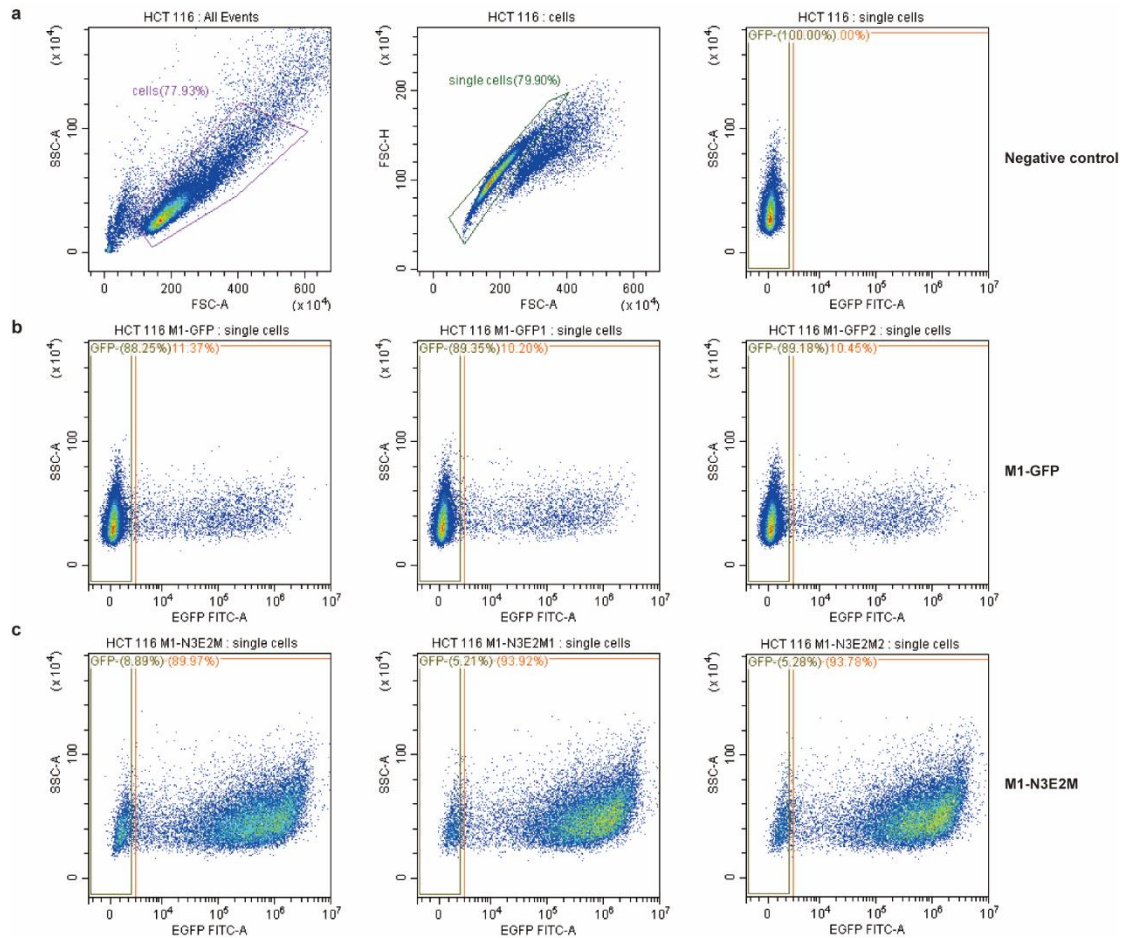

**Fig. S1. Infection rate of M1 viruses on HCT-116 cell line.** HCT-116 cells were infected with M1-GFP and M1-N3E2M (MOI=1) for 48 hours, and the infection rate was determined by flow cytometry. **a** The gating strategy. **b** Flow cytometry analysis showing the levels of GFP<sup>+</sup> cells after infection with M1-GFP. n = 3 biological replicates. **c** Flow cytometry analysis showing the levels of GFP<sup>+</sup> cells after infection with M1-N3E2M. n = 3 biological replicates.

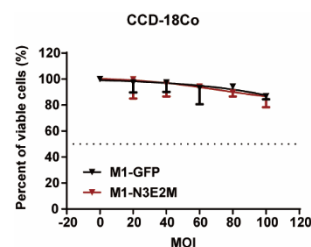

**Fig. S2. Killing effects of M1 viruses on normal cell lines.** CCD-18Co cells were treated with M1-GFP and M1-N3E2M (MOI=20, 40, 60, 80 and 100). EC50 shift was calculated by nonlinear regression. Data points represent mean % viability relative to vehicle  $\pm$  SD, for n = 3 biological replicates. Source data are provided as a Source Data

file.

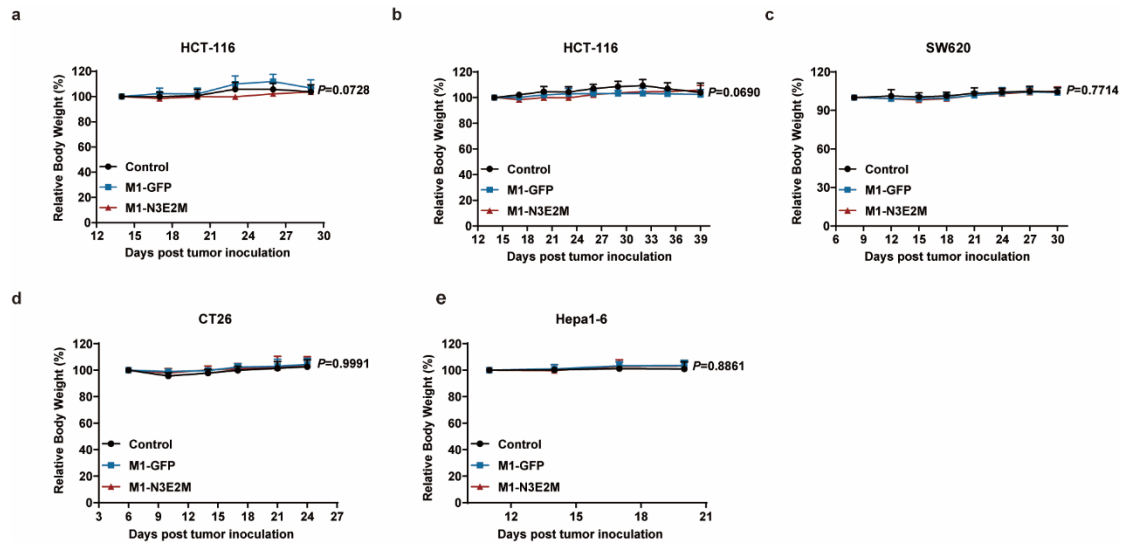

**Fig. S3. The body weights of mice in vivo.** **a** Relative body weights of mice in Fig. 3a were measured every three days.  $n = 7$  mice per group. **b** Relative body weights of mice in Fig. 3e were measured every three days.  $n=7$  mice per group. **c** Relative body weights of mice in Fig. 3g were measured every three days.  $n=10$  mice per group. **d** Relative body weights of mice in Fig. 3i were measured.  $n=5$  mice per group. **e** Relative body weights of mice in Fig. 3k were measured every three days. Control  $n=7$  mice, M1-GFP  $n=9$  mice, M1-N3E2M  $n=8$  mice. Data points (**a-e**) represent mean body weight relative to the body weight before treatment  $\pm$  SD. Statistical significance was calculated using Two-way ANOVA and  $P$  values are indicated. n.s.: no significance ( $P > 0.05$ ). Source data are provided as a Source Data file.

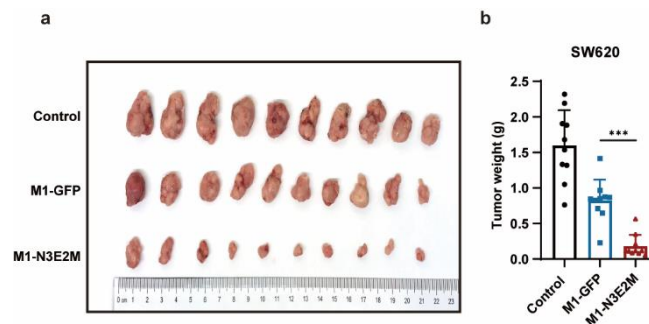

**Fig. S4. Tumor weights of SW620 xenograft models.** **a** Images of tumors from every group in Fig. 3h at the experimental endpoints. **b** Bar graph of tumor weights in every group at the experimental endpoints. Graph bars represent mean tumor weights  $\pm$  SD,

for  $n = 10$  biologically independent samples.  $P = 0.0008$  was calculated using One-way ANOVA with Sidak's multiple comparisons test relative to M1-GFP. \*\*\* $P < 0.001$ . Source data are provided as a Source Data file.

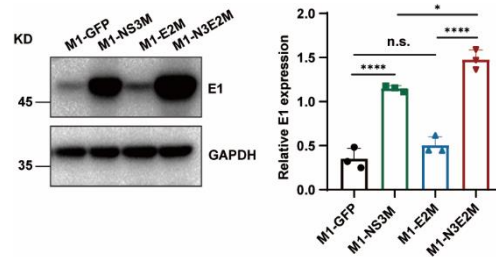

**Fig. S5. The replication of M1 viruses in HCT-116 cells.** The structural protein E1 was detected by Western blotting in HCT-116 cells infected with M1-GFP, M1-NS3M, M1-E2M, or M1-N3E2M at an MOI of 1 at 48 hpi (left). Quantification of E1 expression is shown (right). Graph bars represent mean densitometry of E1  $\pm$  SD, for  $n = 3$  biological replicates. Statistical significance was calculated using One-way ANOVA with Tukey's multiple comparisons test. Adjusted  $P$  values are: M1-NS3M vs. M1-GFP,  $P < 0.0001$ ; M1-E2M vs. M1-GFP,  $P = 0.2913$ ; M1-N3E2M vs. M1-NS3M,  $P = 0.0145$ ; M1-N3E2M vs. M1-E2M,  $P < 0.0001$ . n.s.: no significance \* $P < 0.05$ , \*\*\*\* $P < 0.0001$ . Source data are provided as a Source Data file.

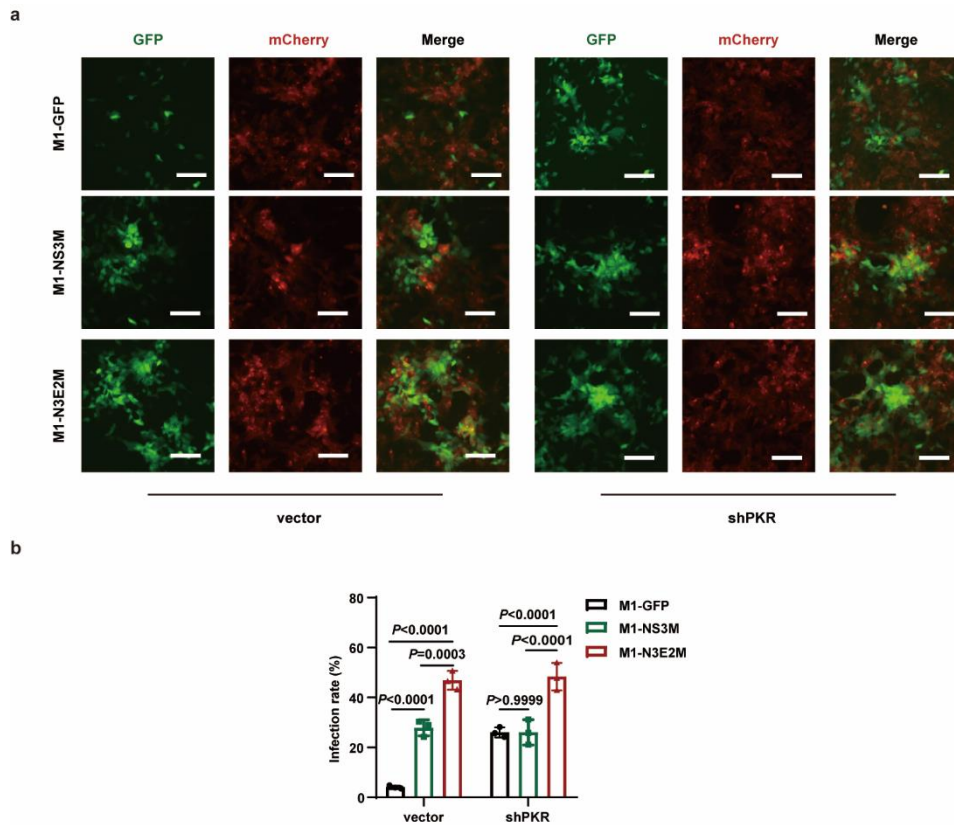

**Fig. S6. The infection of M1 viruses in PKR knockdown HCT-116 cells. a** PKR knockdown cells were infected with M1-GFP, M1-NS3M and M1-N3E2M at an MOI of 1, and imaged with a fluorescence microscope 24 h after infection. Representative images of  $n = 3$ . Scale bars, 50  $\mu\text{m}$ . **b** The infection rate was determined by flow cytometry. Graph bars represent mean infection rate  $\% \pm \text{SD}$ , for  $n = 3$  biological replicates. Statistical significance was calculated using Two-way ANOVA with Sidak's multiple comparisons test relative to M1-GFP and adjusted  $P$  values are indicated. Source data are provided as a Source Data file.

**Supplementary tables:**

Table S1. Host proteins that specifically interact with nsP3

| Accession  | Description                                                                                                           |
|------------|-----------------------------------------------------------------------------------------------------------------------|
| A0A0J9YW13 | RNA-binding protein 8A (Fragment) GN=RBM8A                                                                            |
| B2R858     | cDNA, FLJ93750, Homo sapiens DEAD (Asp-Glu-Ala-Asp) box polypeptide 6 (DDX6), mRNA                                    |
| B4DGW8     | cDNA FLJ60505, highly similar to Apolipoprotein B mRNA-editing enzyme catalytic polypeptide-like 3F                   |
| B4DLY2     | cDNA FLJ56600, highly similar to Large proline-rich protein BAT2                                                      |
| B4DMQ9     | cDNA FLJ58590, highly similar to YLP motif-containing protein 1                                                       |
| B4E3F7     | cDNA FLJ57455, moderately similar to Homo sapiens muscleblind-like 2 (Drosophila) (MBNL2), transcript variant 3, mRNA |
| B5MCT8     | 40S ribosomal protein S9 GN=RPS9                                                                                      |
| B7Z6Y2     | cDNA FLJ54942, highly similar to Homo sapiens bridging integrator 1 (BIN1), transcript variant 10, mRNA               |
| B7Z972     | Protein-L-isoaspartate O-methyltransferase                                                                            |
| C9JC24     | WD repeat-containing protein 48 (Fragment) GN=WDR48                                                                   |
| D3DWL9     | Cleavage and polyadenylation specific factor 1, 160kDa, isoform CRA_a GN=CPSF1                                        |
| E7EWK3     | ATP-dependent RNA helicase DHX36 (Fragment) GN=DHX36                                                                  |
| E7EX53     | Ribosomal protein L15 (Fragment) GN=RPL15                                                                             |
| E9PDY7     | Pleckstrin homology-like domain family B member 2 GN=PHLDB2                                                           |

E9PKG1 Protein arginine N-methyltransferase 1 GN=PRMT1

F8WE71 Serine/threonine-protein phosphatase PP1-beta catalytic subunit  
GN=PPP1CB

G3V1A1 60S ribosomal protein L8 GN=RPL8

G3V279 Enhancer of rudimentary homolog GN=ERH

G5EA18 Double-stranded RNA-binding protein Staufen homolog 2 GN=STAU2

H0YAF8 Receptor of-activated protein C kinase 1 (Fragment) GN=RACK1

H0YAM1 G-rich sequence factor 1 (Fragment) GN=GRSF1

H0YAP0 Zinc finger C2HC domain-containing protein 1A (Fragment)  
GN=ZC2HC1A

H0YIB4 Serine/arginine-rich-splicing factor 9 (Fragment) GN=SRSF9

H0YLA2 Signal recognition particle 14 kDa protein GN=SRP14

H0YLP6 60S ribosomal protein L28 GN=RPL28

H7C3M2 60S ribosomal protein L3 (Fragment) GN=RPL3

H7C4B0 DNA topoisomerase (Fragment) GN=TOP3B

I0B0K3 Truncated profilaggrin GN=FLG

J3KSY7 Protein CASC3 (Fragment) GN=CASC3

J3KT73 60S ribosomal protein L38 GN=RPL38

K7EJB5 Small nuclear ribonucleoprotein Sm D2 GN=SNRPD2

K7EJT5 60S ribosomal protein L22 (Fragment) GN=RPL22

M0QZ60 Signal-transducing adaptor protein 2 GN=STAP2

M0R0P1 rRNA 2'-O-methyltransferase fibrillarlin (Fragment) GN=FBL

M4VP52 Apolipoprotein B editing enzyme catalytic polypeptide-like 3C  
GN=APOBEC3C

O43920 NADH dehydrogenase [ubiquinone] iron-sulfur protein 5 GN=NDUFS5

O75569 Interferon-inducible double-stranded RNA-dependent protein kinase  
activator A GN=PRKRA

O95782 AP-2 complex subunit alpha-1 GN=AP2A1

P04040 Catalase GN=CAT

P19474 E3 ubiquitin-protein ligase TRIM21 GN=TRIM21

P29508 Serpin B3 GN=SERPINB3

P47929 Galectin-7 GN=LGALS7

P62318 Small nuclear ribonucleoprotein Sm D3 GN=SNRPD3

Q09161 Nuclear cap-binding protein subunit 1 GN=NCBP1

Q13643 Four and a half LIM domains protein 3 GN=FHL3

Q2I377 Small proline rich protein

Q2VIL4 RcDNAJ9 (Fragment)

Q2VPJ6 HSP90AA1 protein (Fragment) GN=HSP90AA1

Q53T09 Uncharacterized protein XRCC5 (Fragment) GN=XRCC5

Q59FA2 Splicing factor, arginine/serine-rich 1 (Splicing factor 2, alternate  
splicing factor) variant (Fragment)

Q6NTA2 HNRNPL protein (Fragment) GN=HNRNPL

Q92615 La-related protein 4B GN=LARP4B

Q96DI9 POLDIP3 protein (Fragment) GN=POLDIP3

|        |                                                         |
|--------|---------------------------------------------------------|
| Q96I24 | Far upstream element-binding protein 3 GN=FUBP3         |
| Q9BRL5 | CALM3 protein                                           |
| Q9BYK8 | Helicase with zinc finger domain 2 GN=HELZ2             |
| Q9NZT1 | Calmodulin-like protein 5 GN=CALML5                     |
| Q9Y295 | Developmentally-regulated GTP-binding protein 1 GN=DRG1 |
| S4R456 | 40S ribosomal protein S15 (Fragment) GN=RPS15           |

---

Accession: Protein numbering in the FASTA database. Description: Protein functional descriptions in protein sequence-based databases. GN= Gene Name.

Table S2. Host proteins that specifically interact with nsP3 M358L

---

| Accession  | Description                                                                                                              |
|------------|--------------------------------------------------------------------------------------------------------------------------|
| A0A1W2PRE1 | Guanine nucleotide-binding protein G(o) subunit alpha GN=GNAO1                                                           |
| A1A5C5     | RRBP1 protein GN=RRBP1                                                                                                   |
| B2R4M6     | Protein S100                                                                                                             |
| B3KM36     | cDNA FLJ10153 fis, clone HEMBA1003417, highly similar to BAG family<br>molecular chaperone regulator 2                   |
| B3KME0     | cDNA FLJ10760 fis, clone NT2RP3004618, highly similar to Eukaryotic<br>translation initiation factor 2C 1                |
| B4E1G5     | cDNA FLJ53692, moderately similar to Granulins                                                                           |
| B4E2A4     | cDNA FLJ53275, highly similar to Homo sapiens spectrin domain with coiled-<br>coils 1 (SPECC1), transcript variant, mRNA |
| C9JYQ9     | 60S ribosomal protein L22-like 1 GN=RPL22L1                                                                              |



|        |                                                                                                     |
|--------|-----------------------------------------------------------------------------------------------------|
| E7ETK0 | 40S ribosomal protein S24 GN=RPS24                                                                  |
| F4MHG5 | Ubiquitously transcribed tetratricopeptide repeat protein Y-linked transcript<br>variant 184 GN=UTY |
| F8W1I4 | La-related protein 4 (Fragment) GN=LARP4                                                            |
| G3V1T9 | RNA binding motif protein 7, isoform CRA_a GN=RBM7                                                  |
| J3QSB5 | 60S ribosomal protein L36 GN=RPL36                                                                  |
| P01859 | Immunoglobulin heavy constant gamma 2 GN=IGHG2                                                      |
| P07305 | Histone H1.0 GN=H1F0                                                                                |
| P16403 | Histone H1.2 GN=HIST1H1C                                                                            |
| P18124 | 60S ribosomal protein L7 GN=RPL7                                                                    |
| P19525 | Interferon-induced, double-stranded RNA-activated protein kinase<br>GN=EIF2AK2                      |
| P62753 | 40S ribosomal protein S6 GN=RPS6                                                                    |
| P98179 | RNA-binding protein 3 GN=RBM3                                                                       |
| Q8IWR8 | Ribosomal protein L19 (Fragment)                                                                    |
| Q9UG73 | Uncharacterized protein DKFZp586B1222 (Fragment) GN=DKFZp586B1222                                   |

---

Accession: Protein numbering in the FASTA database. Description: Protein functional descriptions in protein sequence-based databases. GN= Gene Name.

Table S3. Clinical symptoms

---

| Animal No. | Soft stool | Diarrhea | Sparse coat | wound | Scab |
|------------|------------|----------|-------------|-------|------|
| Excipient  |            |          |             |       |      |

---

|          |   |   |   |   |   |
|----------|---|---|---|---|---|
| Male-1   | + | + | - | - | - |
| Male-2   | - | - | - | - | - |
| Female-1 | - | - | - | - | - |
| Female-2 | - | - | - | - | - |
| M1-N3E2M |   |   |   |   |   |
| Male-3   | - | - | - | - | - |
| Male-4   | - | - | - | - | - |
| Female-3 | - | - | - | - | - |
| Female-4 | - | + | - | - | - |

-= No abnormalities, += Present.

Table S4. Ophthalmological examination

| Animal No. | external ocular | anterior chamber | posterior chamber | fundus |
|------------|-----------------|------------------|-------------------|--------|
| Excipient  |                 |                  |                   |        |
| Male-1     | -               | -                | -                 | -      |
| Male-2     | -               | -                | -                 | -      |
| Female-1   | -               | -                | -                 | -      |
| Female-2   | -               | -                | -                 | -      |
| M1-N3E2M   |                 |                  |                   |        |
| Male-3     | -               | -                | -                 | -      |
| Male-4     | -               | -                | -                 | -      |
| Female-3   | -               | -                | -                 | -      |

Female-4                    -                    -                    -                    -

-= No abnormalities.

Table S5. Urinalysis

| Animal No. | Days | clarity   | pH | GLU | PRO | KET | BLD | LEU |
|------------|------|-----------|----|-----|-----|-----|-----|-----|
| Excipient  |      |           |    |     |     |     |     |     |
| Male-1     | -5   | Lt.Turbid | 9  | neg | neg | neg | 5+  | 2+  |
|            | 68   | Clear     | 9  | neg | neg | neg | neg | neg |
| Male-2     | -5   | Turbid    | 8  | neg | 2+  | 1+  | 5+  | 1+  |
|            | 68   | Lt.Turbid | 8  | neg | 1+  | neg | neg | neg |
| Female-1   | -5   | Turbid    | 9  | neg | 2+  | neg | 5+  | 3+  |
|            | 68   | Turbid    | 8  | neg | 2+  | 1+  | 2+  | 3+  |
| Female-2   | -5   | Clear     | 8  | neg | neg | neg | 3+  | 2+  |
|            | 68   | Turbid    | 8  | neg | 1+  | Neg | 4+  | 3+  |
| M1-N3E2M   |      |           |    |     |     |     |     |     |
| Male-3     | -5   | Lt.Turbid | 9  | neg | 1+  | neg | neg | neg |
|            | 68   | Lt.Turbid | 9  | neg | 1+  | neg | 1+  | 1+  |
| Male-4     | -5   | Lt.Turbid | 8  | neg | 2+  | 1+  | 3+  | 1+  |
|            | 68   | Clear     | 9  | neg | neg | neg | 4+  | neg |
| Female-3   | -5   | Lt.Turbid | 9  | neg | 1+  | neg | 2+  | 1+  |
|            | 68   | Lt.Turbid | 9  | neg | 1+  | neg | neg | 3+  |
| Female-4   | -5   | Turbid    | 9  | neg | 1+  | neg | 5+  | 3+  |

68 Lt.Turbid 8 neg neg neg neg 3+

GLU (Glucose) :1+ ≈ ~3 mmol/L, 2+ ≈ ~6 mmol/L, 3+ ≈ ~17mmol/L, 4+ ≈ ~56 mmol/L

KET (Ketone) :1+ ≈ ~0.5 mmol/L, 2+ ≈ ~1.5 mmol/L, 3+ ≈ ~5 mmol/L,4+ ≈ ~15 mmol/L

BLD (Blood) :1+ ≈ ~10 /μL, 2+ ≈ ~25 /μL, 3+ ≈ ~50 /μL, 4+ ≈ ~150 /μL 5+ ≈ ~250 /μL

PRO (Protein):1+ ≈ ~0.25 g/L, 2+ ≈ ~0.75 g/L, 3+ ≈ ~1.5 g/L, 4+ ≈ ~5 g/L

LEU (Leucocyte): 1+ ≈ ~25 /μL, 2+ ≈ ~100 /μL, 3+ ≈ ~500 /μL

Lt.Turbid = Light Turbid, neg=negative

Table S6. Anti-M1 antibodies in macaque serum

| Animal No. | D-3 | D20 | D43 | D72 |
|------------|-----|-----|-----|-----|
| Excipient  |     |     |     |     |
| Male-1     | -   | -   | -   | -   |
| Male-2     | -   | -   | -   | -   |
| Female-1   | -   | -   | -   | -   |
| Female-2   | -   | -   | -   | -   |
| M1-N3E2M   |     |     |     |     |
| Male-3     | -   | -   | -   | -   |
| Male-4     | -   | +   | -   | -   |
| Female-3   | -   | -   | -   | -   |
| Female-4   | -   | +   | -   | -   |

-= Negative, +=Positive.

Table S7. Primers used for genome sequencing

|            | Forward Primers (F)      | Reverse Primers (R)              |
|------------|--------------------------|----------------------------------|
| 1-1144     | ATGGCGGACGTGTGACATC      | TCTGGGCATCCTCTGGTG               |
| 981-2413   | TTACGCAGTTACCCATCAC      | CTTTCTTGACCCATTCA                |
| 2335-3830  | AATGATGTAAAGAGGCAACG     | GGTCTAAGCAGGTGTAGTGAA            |
| 3544-4975  | AGGGTAGAGTGGTTGCTGA      | GCACGCCTTCTATCCTGT               |
| 4931-6315  | TGTGCTCCTCCTTTCCAT       | AAACACCGCAGAGTCCA                |
| 6084-7524  | CGCTTATCTGGACTTGGT       | TGTCTGTAATACGTGGTCTTTA           |
| 7375-PR1   | AGTGGCGTCGGGAACATC       | AACAGCTCCTCGCCCTTGCTCACCA        |
| PF2-8809   | ATGGTGAGCAAGGGCGAGGAGCTG | ATCGTGCCTCGAATAGCG               |
|            | T                        |                                  |
| 8642-10136 | TTCCGATGGCATGATAAA       | CGGCACGACTGTCTTGTA               |
| 9936-11696 | TTGGTGAGCCTGGGAAC        | GTAAAATATTAACAAAACAAATTA<br>GACG |

The primers were synthesized at Thermo Fisher Scientific company.

Table S8. Cell line

| Name     | Cat no. | source | STR<br>identification | Mycoplasma<br>contamination | application                     |
|----------|---------|--------|-----------------------|-----------------------------|---------------------------------|
| Sk-HEP-1 | HTB-52  | ATCC   | Correct               | Negative                    | Fig. 2a, b                      |
| HCT-116  | CCL-247 | ATCC   | Correct               | Negative                    | Fig. 1, 2a-b,<br>3a-f, 4, 5a-c, |

|                 |           |      |         |          | 6a-o, S1, S3a-<br>b, S5, S6,<br>Fig. 2a, b |
|-----------------|-----------|------|---------|----------|--------------------------------------------|
| ZR-75-1         | CRL-1500  | ATCC | Correct | Negative | Fig. 2a, b                                 |
| HCT-8           | 100308    | BNCC | Correct | Negative | Fig. 2a, c, d                              |
| RT112/84        | RT112/84  | NTCC | Correct | Negative | Fig. 2a, b                                 |
| MCF-7           | HTB-22    | ATCC | Correct | Negative | Fig. 2a, b                                 |
| Capan-2         | HTB-80    | ATCC | Correct | Negative | Fig. 2a, b                                 |
| Huh 7           | 337690    | BNCC | Correct | Negative | Fig. 2a, b, e, f                           |
| BT-20           | HTB-19    | ATCC | Correct | Negative | Fig. 2a, b                                 |
| MDA-<br>MB-435S | HTB-129   | ATCC | Correct | Negative | Fig. 2a, b                                 |
| HPAC            | CRL-2119  | ATCC | Correct | Negative | Fig. 2a, b                                 |
| PANC-1          | CRL-1469  | ATCC | Correct | Negative | Fig. 2a, b                                 |
| HT-29           | HTB-38    | ATCC | Correct | Negative | Fig. 2a, b                                 |
| MIA<br>PaCa-2   | CRL-1420  | ATCC | Correct | Negative | Fig. 2a, b                                 |
| HCC38           | CRL-2314  | ATCC | Correct | Negative | Fig. 2a, b                                 |
| HT-1376         | CRL-1472  | ATCC | Correct | Negative | Fig. 2a, b                                 |
| SW620           | CCL-227   | ATCC | Correct | Negative | Fig. 2a-b, 3g-<br>h, S3c, S4,              |
| SW 1990         | CRL-2172  | ATCC | Correct | Negative | Fig. 2a, b                                 |
| T-47D           | HTB-133   | ATCC | Correct | Negative | Fig. 2a, b                                 |
| DU 145          | HTB-81    | ATCC | Correct | Negative | Fig. 2a, b                                 |
| VM-CUB-<br>1    | CVCL_1786 | NTCC | Correct | Negative | Fig. 2a, b                                 |
| HCT-15          | CCL-225   | ATCC | Correct | Negative | Fig. 2a, b                                 |
| SW480           | CCL-228   | ATCC | Correct | Negative | Fig. 2a, b                                 |
| Capan-1         | HTB-79    | ATCC | Correct | Negative | Fig. 2a, b                                 |
| BxPC-3          | CRL-1687  | ATCC | Correct | Negative | Fig. 2a, b                                 |

|                |           |      |         |          |               |
|----------------|-----------|------|---------|----------|---------------|
| MDA-<br>MB-231 | HTB-26    | ATCC | Correct | Negative | Fig. 2a, b    |
| SCaBER         | HTB-3     | ATCC | Correct | Negative | Fig. 2a, b    |
| CFPAC-1        | CRL-1918  | ATCC | Correct | Negative | Fig. 2a, b    |
| J82            | HTB-1     | ATCC | Correct | Negative | Fig. 2a, b    |
| RT4            | HTB-2     | ATCC | Correct | Negative | Fig. 2a, b    |
| SU.86.86       | CRL-1837  | ATCC | Correct | Negative | Fig. 2a, b    |
| LoVo           | CCL-229   | ATCC | Correct | Negative | Fig. 2a, b    |
| PK59           | PK59_PANC | NTCC | Correct | Negative | Fig. 2a, b    |
|                | REAS      |      |         |          |               |
| 22Rv1          | CRL-2505  | ATCC | Correct | Negative | Fig. 2a, b    |
| MDA-<br>MB-468 | HTB-132   | ATCC | Correct | Negative | Fig. 2a, b    |
| HT-1197        | CRL-1473  | ATCC | Correct | Negative | Fig. 2a, b    |
| Caco-2         | HTB-37    | ATCC | Correct | Negative | Fig. 2a, b    |
| PC-3M-<br>2B4  | 363012    | BNCC | Correct | Negative | Fig. 2a, b    |
| 1A6            | CVCL_6344 | NTCC | Correct | Negative | Fig. 2a, b    |
| SK-BR-3        | HTB-30    | ATCC | Correct | Negative | Fig. 2a, b    |
| KU-19-19       | ACC 395   | NTCC | Correct | Negative | Fig. 2a, b    |
| 647-V          | ACC 414   | NTCC | Correct | Negative | Fig. 2a, b    |
| UM-UC-3        | CRL-1749  | ATCC | Correct | Negative | Fig. 2a, b    |
| 5637           | HTB-9     | ATCC | Correct | Negative | Fig. 2a, b    |
| BT-474         | HTB-20    | ATCC | Correct | Negative | Fig. 2a, b    |
| Hs 578T        | HTB-126   | ATCC | Correct | Negative | Fig. 2a-b, 5g |
| HCC 1806       | CRL-2335  | ATCC | Correct | Negative | Fig. 2a, b    |
| AsPC-1         | CRL-1682  | ATCC | Correct | Negative | Fig. 2a, b    |
| HCC1428        | CRL-2327  | ATCC | Correct | Negative | Fig. 2a, b    |
| SW780          | CRL-2169  | ATCC | Correct | Negative | Fig. 2a, b    |

|                |           |      |         |          |                          |
|----------------|-----------|------|---------|----------|--------------------------|
| MDA-<br>MB-453 | HTB-131   | ATCC | Correct | Negative | Fig. 2a, b               |
| MDA-<br>MB-157 | HTB-24    | ATCC | Correct | Negative | Fig. 2a, b               |
| LNCaP          | CRL-1740  | ATCC | Correct | Negative | Fig. 2a, b               |
| BFTC-905       | ACC 361   | NTCC | Correct | Negative | Fig. 2a, b               |
| PNT1A          | CVCL_2163 | NTCC | Correct | Negative | Fig. 2a, b               |
| VCaP           | CRL-2876  | ATCC | Correct | Negative | Fig. 2a, b               |
| SW1710         | ACC-426   | NTCC | Correct | Negative | Fig. 2a, b               |
| CCD-<br>18Co   | CRL-1459  | ATCC | Correct | Negative | Fig. 2g-j, 6p-<br>q, S2a |
| HeLa           | CCL-2     | ATCC | Correct | Negative | Fig. 5f                  |
| CT-26          | CRL-2638  | ATCC | Correct | Negative | Fig. 3i-j, S3d,          |
| HEPA1-6        | CRL-1830  | ATCC | Correct | Negative | Fig. 3k-l, S3e           |

---

ATCC: American Type Culture Collection

NTCC: National Typical Culture Collection (Beijing, China)

BNCC: BeNa Culture Collection (Beijing, China)
